# Supplementary material for: A biomimetic approach for enhancing the in vivo half-life of peptides
Source: Springer Nature journal article supplement (doi:10.1038/nchembio.1907), 2015-09-07
Supplement: 41589_2015_BFnchembio1907_MOESM13_ESM.mol [file 41589_2015_BFnchembio1907_MOESM13_ESM.mol]

  ChemDraw08191507092D

128135  0  0  0  0  0  0  0  0999 V2000
  -11.3991    1.2253    0.0000 N   0  0  0  0  0  0  0  0  0  0  0  0
  -11.8696    2.1697    0.0000 N   0  0  0  0  0  0  0  0  0  0  0  0
  -12.7953    1.8669    0.0000 N   0  0  0  0  0  0  0  0  0  0  0  0
  -12.7771    1.0421    0.0000 C   0  0  0  0  0  0  0  0  0  0  0  0
  -12.0614    0.6641    0.0000 C   0  0  0  0  0  0  0  0  0  0  0  0
  -13.4872    0.6220    0.0000 C   0  0  0  0  0  0  0  0  0  0  0  0
  -14.2060    1.0269    0.0000 C   0  0  0  0  0  0  0  0  0  0  0  0
  -14.9161    0.6069    0.0000 C   0  0  0  0  0  0  0  0  0  0  0  0
  -15.6349    1.0118    0.0000 O   0  0  0  0  0  0  0  0  0  0  0  0
  -17.7767    0.5765    0.0000 C   0  0  0  0  0  0  0  0  0  0  0  0
  -17.7679   -0.2501    0.0000 C   0  0  0  0  0  0  0  0  0  0  0  0
  -17.0477   -0.6558    0.0000 C   0  0  0  0  0  0  0  0  0  0  0  0
  -16.3362   -0.2349    0.0000 C   0  0  0  0  0  0  0  0  0  0  0  0
  -16.3449    0.5917    0.0000 C   0  0  0  0  0  0  0  0  0  0  0  0
  -17.0652    0.9975    0.0000 C   0  0  0  0  0  0  0  0  0  0  0  0
  -17.0389   -1.4808    0.0000 O   0  0  0  0  0  0  0  0  0  0  0  0
  -16.3241   -1.8834    0.0000 C   0  0  0  0  0  0  0  0  0  0  0  0
  -16.3154   -2.7038    0.0000 C   0  0  0  0  0  0  0  0  0  0  0  0
  -17.0215   -3.1215    0.0000 C   0  0  0  0  0  0  0  0  0  0  0  0
  -17.0215   -3.9465    0.0000 C   0  0  0  0  0  0  0  0  0  0  0  0
  -17.6890   -4.4314    0.0000 C   0  0  0  0  0  0  0  0  0  0  0  0
  -17.4340   -5.2160    0.0000 N   0  0  0  0  0  0  0  0  0  0  0  0
  -16.6090   -5.2160    0.0000 N   0  0  0  0  0  0  0  0  0  0  0  0
  -16.3541   -4.4314    0.0000 C   0  0  0  0  0  0  0  0  0  0  0  0
  -15.5695   -4.1765    0.0000 C   0  0  0  0  0  0  0  0  0  0  0  0
  -18.4736   -4.1765    0.0000 C   0  0  0  0  0  0  0  0  0  0  0  0
   13.0685    1.0910    0.0000 N   0  0  0  0  0  0  0  0  0  0  0  0
    6.6383    1.5035    0.0000 N   0  0  0  0  0  0  0  0  0  0  0  0
    5.9238    1.0910    0.0000 C   0  0  0  0  0  0  0  0  0  0  0  0
    5.9238    0.2660    0.0000 O   0  0  0  0  0  0  0  0  0  0  0  0
    5.2093    1.5035    0.0000 C   0  0  0  0  0  0  0  0  0  0  0  0
    7.3527    1.0910    0.0000 C   0  0  0  0  0  0  0  0  0  0  0  0
    8.0672    1.5035    0.0000 C   0  0  0  0  0  0  0  0  0  0  0  0
    8.7817    1.0910    0.0000 N   0  0  0  0  0  0  0  0  0  0  0  0
    8.0672    2.3285    0.0000 O   0  0  0  0  0  0  0  0  0  0  0  0
    9.4961    1.5035    0.0000 C   0  0  0  0  0  0  0  0  0  0  0  0
   10.2106    1.0910    0.0000 C   0  0  0  0  0  0  0  0  0  0  0  0
   10.9251    1.5035    0.0000 N   0  0  0  0  0  0  0  0  0  0  0  0
   11.6396    1.0910    0.0000 C   0  0  0  0  0  0  0  0  0  0  0  0
   12.3540    1.5035    0.0000 C   0  0  0  0  0  0  0  0  0  0  0  0
   10.2106    0.2660    0.0000 O   0  0  0  0  0  0  0  0  0  0  0  0
   12.3540    2.3285    0.0000 O   0  0  0  0  0  0  0  0  0  0  0  0
   11.6396    0.2660    0.0000 C   0  0  0  0  0  0  0  0  0  0  0  0
    7.3527    0.2660    0.0000 C   0  0  0  0  0  0  0  0  0  0  0  0
   13.7830    2.3285    0.0000 C   0  0  0  0  0  0  0  0  0  0  0  0
   14.4974    2.7410    0.0000 C   0  0  0  0  0  0  0  0  0  0  0  0
   14.4974    3.5660    0.0000 C   0  0  0  0  0  0  0  0  0  0  0  0
   15.2119    3.9785    0.0000 N   0  0  0  0  0  0  0  0  0  0  0  0
   15.2119    4.8035    0.0000 C   0  0  0  0  0  0  0  0  0  0  0  0
   15.9264    5.2160    0.0000 N   0  0  0  0  0  0  0  0  0  0  0  0
   14.4974    5.2160    0.0000 N   0  0  0  0  0  0  0  0  0  0  0  0
   12.1257   -0.4026    0.0000 C   0  0  0  0  0  0  0  0  0  0  0  0
   11.7904   -1.1564    0.0000 C   0  0  0  0  0  0  0  0  0  0  0  0
   12.9462   -0.3161    0.0000 C   0  0  0  0  0  0  0  0  0  0  0  0
    8.0672   -0.1465    0.0000 C   0  0  0  0  0  0  0  0  0  0  0  0
    7.9140   -0.9589    0.0000 C   0  0  0  0  0  0  0  0  0  0  0  0
    8.5410   -1.4977    0.0000 C   0  0  0  0  0  0  0  0  0  0  0  0
    9.3211   -1.2241    0.0000 C   0  0  0  0  0  0  0  0  0  0  0  0
    9.4743   -0.4118    0.0000 C   0  0  0  0  0  0  0  0  0  0  0  0
    8.8473    0.1271    0.0000 C   0  0  0  0  0  0  0  0  0  0  0  0
    9.9468   -1.7619    0.0000 O   0  0  0  0  0  0  0  0  0  0  0  0
    4.4948    1.0910    0.0000 N   0  0  0  0  0  0  0  0  0  0  0  0
    3.7804    1.5035    0.0000 C   0  0  0  0  0  0  0  0  0  0  0  0
    3.0659    1.0910    0.0000 C   0  0  0  0  0  0  0  0  0  0  0  0
    2.3514    1.5035    0.0000 N   0  0  0  0  0  0  0  0  0  0  0  0
    1.6370    1.0910    0.0000 C   0  0  0  0  0  0  0  0  0  0  0  0
    0.9225    1.5035    0.0000 C   0  0  0  0  0  0  0  0  0  0  0  0
    0.2080    1.0910    0.0000 N   0  0  0  0  0  0  0  0  0  0  0  0
   -0.5065    1.5035    0.0000 C   0  0  0  0  0  0  0  0  0  0  0  0
   -1.2209    1.0910    0.0000 C   0  0  0  0  0  0  0  0  0  0  0  0
   -1.9354    1.5849    0.0000 N   0  0  0  0  0  0  0  0  0  0  0  0
    3.7804    2.3285    0.0000 O   0  0  0  0  0  0  0  0  0  0  0  0
    1.6370    0.2660    0.0000 O   0  0  0  0  0  0  0  0  0  0  0  0
   -0.5065    2.3285    0.0000 O   0  0  0  0  0  0  0  0  0  0  0  0
    5.2093    2.3285    0.0000 C   0  0  0  0  0  0  0  0  0  0  0  0
    5.9238    2.7410    0.0000 O   0  0  0  0  0  0  0  0  0  0  0  0
    3.0659    0.2660    0.0000 C   0  0  0  0  0  0  0  0  0  0  0  0
    3.7804   -0.1465    0.0000 C   0  0  0  0  0  0  0  0  0  0  0  0
    3.8677   -0.9775    0.0000 C   0  0  0  0  0  0  0  0  0  0  0  0
    4.6850   -1.1512    0.0000 C   0  0  0  0  0  0  0  0  0  0  0  0
    5.1028   -0.4276    0.0000 N   0  0  0  0  0  0  0  0  0  0  0  0
    4.5437    0.1934    0.0000 C   0  0  0  0  0  0  0  0  0  0  0  0
    3.3086   -1.5984    0.0000 C   0  0  0  0  0  0  0  0  0  0  0  0
    3.5668   -2.3931    0.0000 C   0  0  0  0  0  0  0  0  0  0  0  0
    4.3841   -2.5668    0.0000 C   0  0  0  0  0  0  0  0  0  0  0  0
    4.9432   -1.9459    0.0000 C   0  0  0  0  0  0  0  0  0  0  0  0
    0.9225    2.3285    0.0000 C   0  0  0  0  0  0  0  0  0  0  0  0
    1.5150    2.9444    0.0000 C   0  0  0  0  0  0  0  0  0  0  0  0
    2.3111    2.7217    0.0000 C   0  0  0  0  0  0  0  0  0  0  0  0
    2.7689    3.4100    0.0000 N   0  0  0  0  0  0  0  0  0  0  0  0
    2.2557    4.0581    0.0000 C   0  0  0  0  0  0  0  0  0  0  0  0
    1.4807    3.7703    0.0000 N   0  0  0  0  0  0  0  0  0  0  0  0
   -1.2209    0.2660    0.0000 C   0  0  0  0  0  0  0  0  0  0  0  0
   -0.5065   -0.1465    0.0000 C   0  0  0  0  0  0  0  0  0  0  0  0
   -0.5065   -0.9715    0.0000 C   0  0  0  0  0  0  0  0  0  0  0  0
   -2.6523    1.1767    0.0000 C   0  0  0  0  0  0  0  0  0  0  0  0
   -2.6573    0.3517    0.0000 O   0  0  0  0  0  0  0  0  0  0  0  0
   -3.3643    1.5935    0.0000 C   0  0  0  0  0  0  0  0  0  0  0  0
   -4.0813    1.1853    0.0000 C   0  0  0  0  0  0  0  0  0  0  0  0
   -4.7932    1.6021    0.0000 O   0  0  0  0  0  0  0  0  0  0  0  0
   -5.5102    1.1939    0.0000 C   0  0  0  0  0  0  0  0  0  0  0  0
   -6.2221    1.6107    0.0000 C   0  0  0  0  0  0  0  0  0  0  0  0
   -6.9391    1.2025    0.0000 O   0  0  0  0  0  0  0  0  0  0  0  0
   -7.6511    1.6193    0.0000 C   0  0  0  0  0  0  0  0  0  0  0  0
   -8.3680    1.2111    0.0000 C   0  0  0  0  0  0  0  0  0  0  0  0
   -9.0800    1.6279    0.0000 O   0  0  0  0  0  0  0  0  0  0  0  0
   -9.7969    1.2198    0.0000 C   0  0  0  0  0  0  0  0  0  0  0  0
  -10.5089    1.6366    0.0000 C   0  0  0  0  0  0  0  0  0  0  0  0
   14.4989    1.0902    0.0000 C   0  0  0  0  0  0  0  0  0  0  0  0
   15.2134    1.5027    0.0000 N   0  0  0  0  0  0  0  0  0  0  0  0
   14.4989    0.2652    0.0000 O   0  0  0  0  0  0  0  0  0  0  0  0
   17.1296   -0.0457    0.0000 N   0  0  0  0  0  0  0  0  0  0  0  0
   15.9636    1.1686    0.0000 C   0  0  0  0  0  0  0  0  0  0  0  0
   15.2993    2.3205    0.0000 C   0  0  0  0  0  0  0  0  0  0  0  0
   16.1037    2.4915    0.0000 C   0  0  0  0  0  0  0  0  0  0  0  0
   16.5149    1.7793    0.0000 C   0  0  0  0  0  0  0  0  0  0  0  0
   16.1356    0.3638    0.0000 C   0  0  0  0  0  0  0  0  0  0  0  0
   15.5245   -0.1864    0.0000 O   0  0  0  0  0  0  0  0  0  0  0  0
   13.7830    1.5035    0.0000 C   0  0  0  0  0  0  0  0  0  0  0  0
   17.7845    0.4589    0.0000 C   0  0  0  0  0  0  0  0  0  0  0  0
   18.5489    0.1440    0.0000 C   0  0  0  0  0  0  0  0  0  0  0  0
   19.2038    0.6485    0.0000 N   0  0  0  0  0  0  0  0  0  0  0  0
   18.6584   -0.6754    0.0000 O   0  0  0  0  0  0  0  0  0  0  0  0
  -18.4902    0.9885    0.0000 C   0  0  0  0  0  0  0  0  0  0  0  0
  -18.4902    1.8124    0.0000 O   0  0  0  0  0  0  0  0  0  0  0  0
  -19.2038    0.5765    0.0000 O   0  0  0  0  0  0  0  0  0  0  0  0
    0.2095   -1.3848    0.0000 O   0  0  0  0  0  0  0  0  0  0  0  0
   -1.2224   -1.3848    0.0000 O   0  0  0  0  0  0  0  0  0  0  0  0
  1  2  1  0      
  2  3  2  0      
  3  4  1  0      
  4  5  2  0      
  5  1  1  0      
  4  6  1  0      
  6  7  1  0      
  7  8  1  0      
  8  9  1  0      
 10 11  2  0      
 11 12  1  0      
 12 13  2  0      
 13 14  1  0      
 14 15  2  0      
 15 10  1  0      
 14  9  1  0      
 10124  1  0      
 12 16  1  0      
 16 17  1  0      
 17 18  1  0      
 18 19  1  0      
 19 20  1  0      
 20 21  1  0      
 21 22  2  0      
 22 23  1  0      
 23 24  1  0      
 24 20  2  0      
 24 25  1  0      
 21 26  1  0      
119 27  1  0      
 28 29  1  0      
 29 30  2  0      
 29 31  1  0      
 32 28  1  0      
 32 33  1  0      
 33 34  1  0      
 33 35  2  0      
 34 36  1  0      
 36 37  1  0      
 37 38  1  0      
 38 39  1  0      
 39 40  1  0      
 37 41  2  0      
 40 42  2  0      
 27 40  1  0      
 45 46  1  0      
 46 47  1  0      
 47 48  1  0      
 48 49  1  0      
 49 50  2  0      
 49 51  1  0      
 43 52  1  0      
 52 53  1  0      
 52 54  1  0      
 44 55  1  0      
 55 56  2  0      
 56 57  1  0      
 57 58  2  0      
 58 59  1  0      
 59 60  2  0      
 60 55  1  0      
 58 61  1  0      
 31 62  1  0      
 62 63  1  0      
 63 64  1  0      
 64 65  1  0      
 65 66  1  0      
 66 67  1  0      
 67 68  1  0      
 68 69  1  0      
 69 70  1  0      
 70 71  1  0      
 63 72  2  0      
 66 73  2  0      
 69 74  2  0      
 75 76  1  0      
 77 78  1  0      
 78 79  1  0      
 79 80  2  0      
 80 81  1  0      
 81 82  1  0      
 82 78  2  0      
 79 83  1  0      
 83 84  2  0      
 84 85  1  0      
 85 86  2  0      
 86 80  1  0      
 87 88  1  0      
 88 89  2  0      
 89 90  1  0      
 90 91  1  0      
 91 92  2  0      
 92 88  1  0      
 93 94  1  0      
 94 95  1  0      
 96 97  2  0      
 96 98  1  0      
 98 99  1  0      
 99100  1  0      
100101  1  0      
101102  1  0      
102103  1  0      
103104  1  0      
104105  1  0      
105106  1  0      
106107  1  0      
107108  1  0      
 71 96  1  0      
108  1  1  0      
 70 93  1  6      
 67 87  1  1      
 64 77  1  6      
 31 75  1  1      
 32 44  1  6      
 39 43  1  6      
119 45  1  1      
109110  1  0      
109111  2  0      
110113  1  0      
110114  1  0      
114115  1  0      
115116  1  0      
113117  1  0      
117118  2  0      
117112  1  0      
113116  1  1      
109119  1  0      
112120  1  0      
120121  1  0      
121122  1  0      
121123  2  0      
124125  2  0      
124126  1  0      
 95127  2  0      
 95128  1  0      
M  END
